# Supplementary material for: Markov state models from hierarchical density-based assignment
Source: bioRxiv or medRxiv preprint supplement (doi:10.1101/2021.05.13.444064), 2021-05-15
Supplement: Supplementary file [file media-1.pdf]

## Supplementary material for

### Markov state models from hierarchical density based assignment

Ion Mitxelena,<sup>1</sup> Xabier López,<sup>1</sup> and David de Sancho<sup>1, a)</sup>

*Polimero eta Material Aurreratuak: Fisika, Kimika eta Teknologia, Kimika Fakultatea,  
UPV/EHU & Donostia International Physics Center (DIPC), PK 1072,  
20018 Donostia-San Sebastian, Spain*

(Dated: 13 May 2021)

---

<sup>a)</sup>Electronic mail: david.desancho@ehu.eus

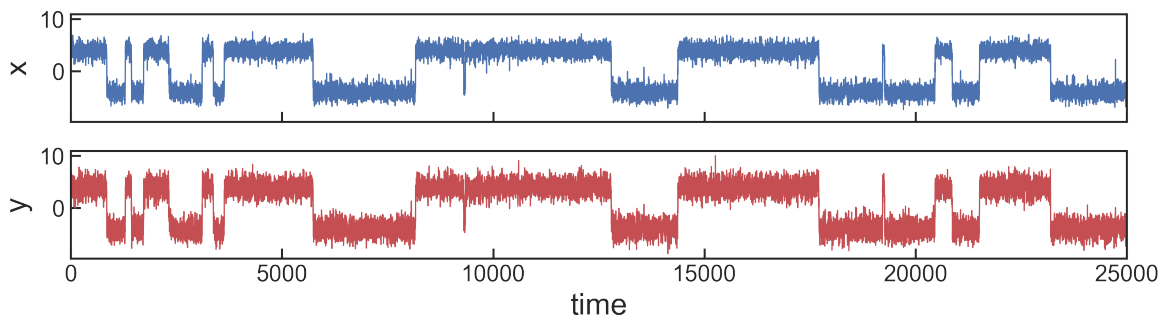

FIG. S1: Time series data corresponding to the brownian dynamics trajectory on a two-dimensional potential.

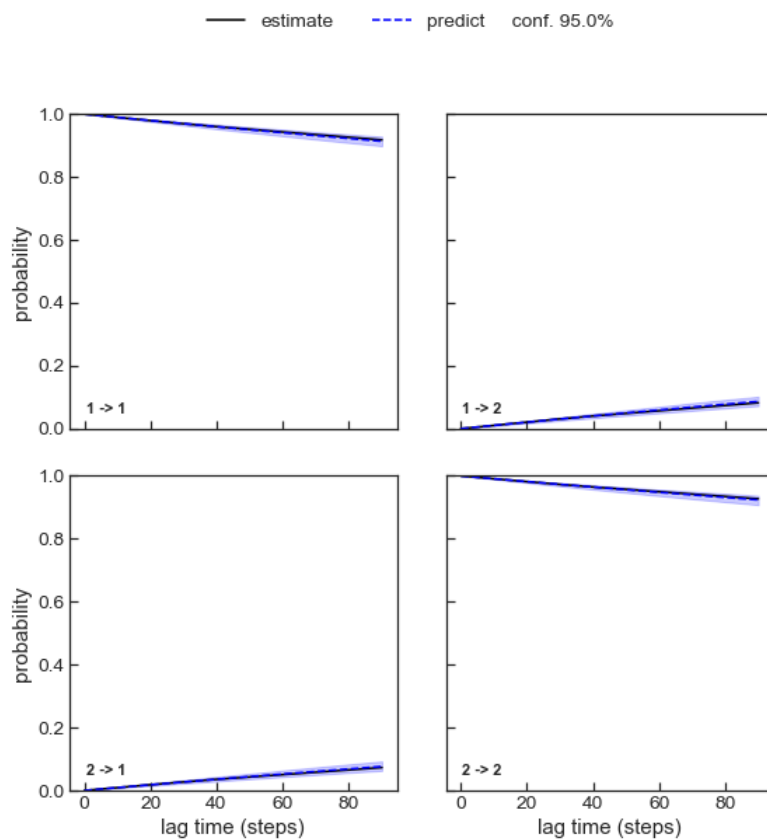

FIG. S2: Chapman-Kolmogorov tests corresponding to the two-dimensional potential from PCCA+.

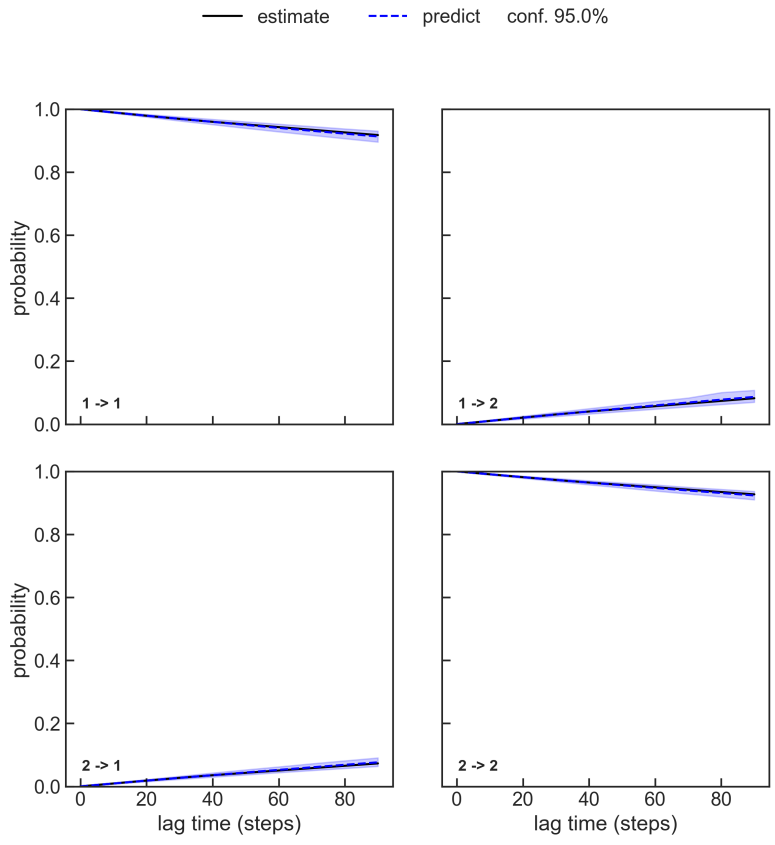

FIG. S3: Chapman-Kolmogorov tests corresponding to the two-dimensional potential for the hdbMSM.

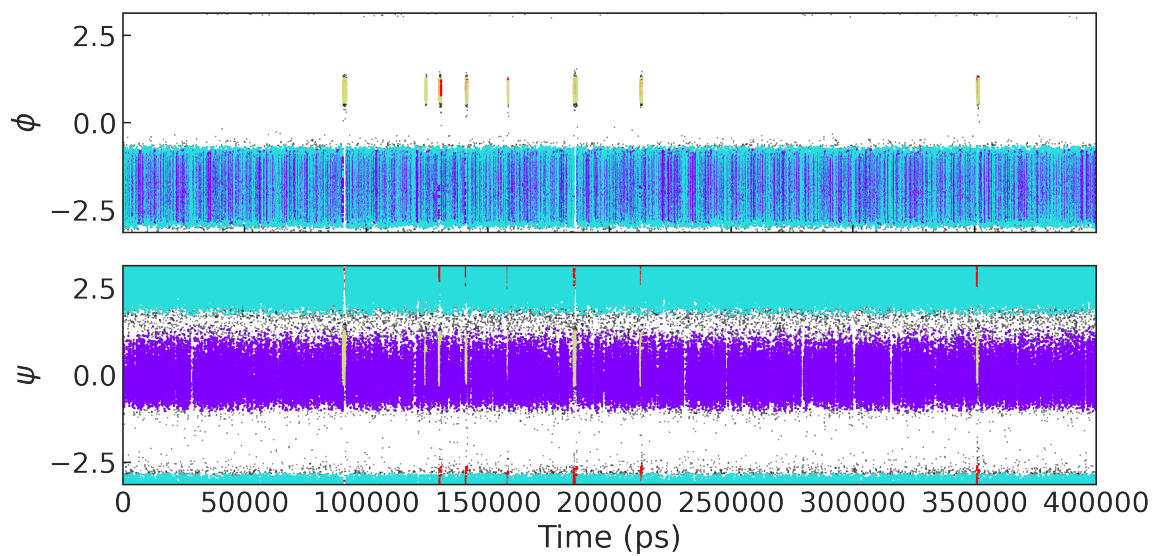

FIG. S4: Backbone torsion angles with different colours for each HDBSCAN cluster along simulation trajectory of alanine dipeptide.

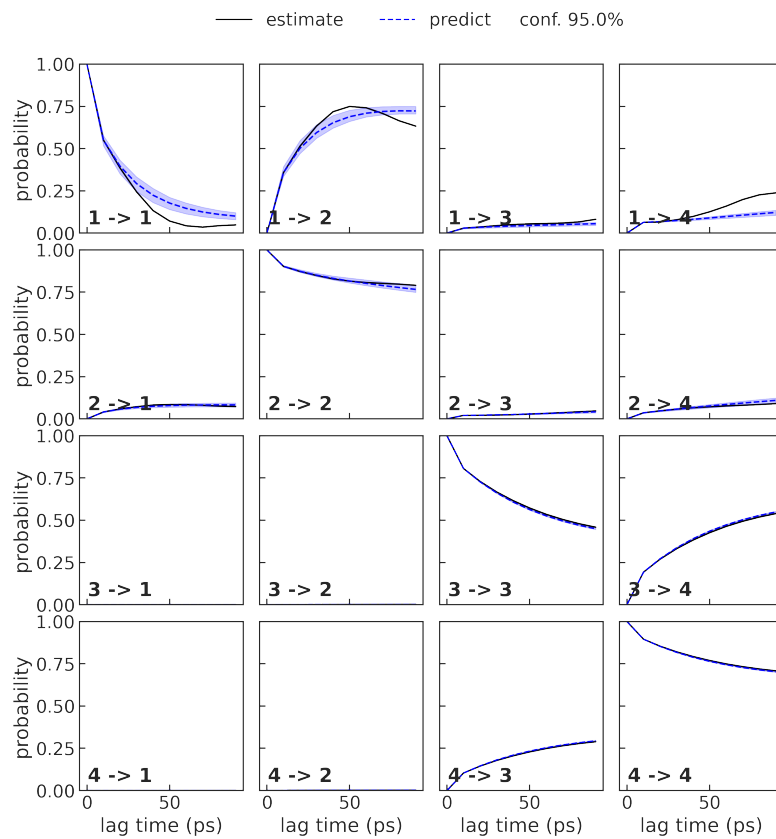

FIG. S5: Chapman-Kolmogorov tests corresponding to alanine dipeptide. for the PCCA+ coarse-grained MSM.

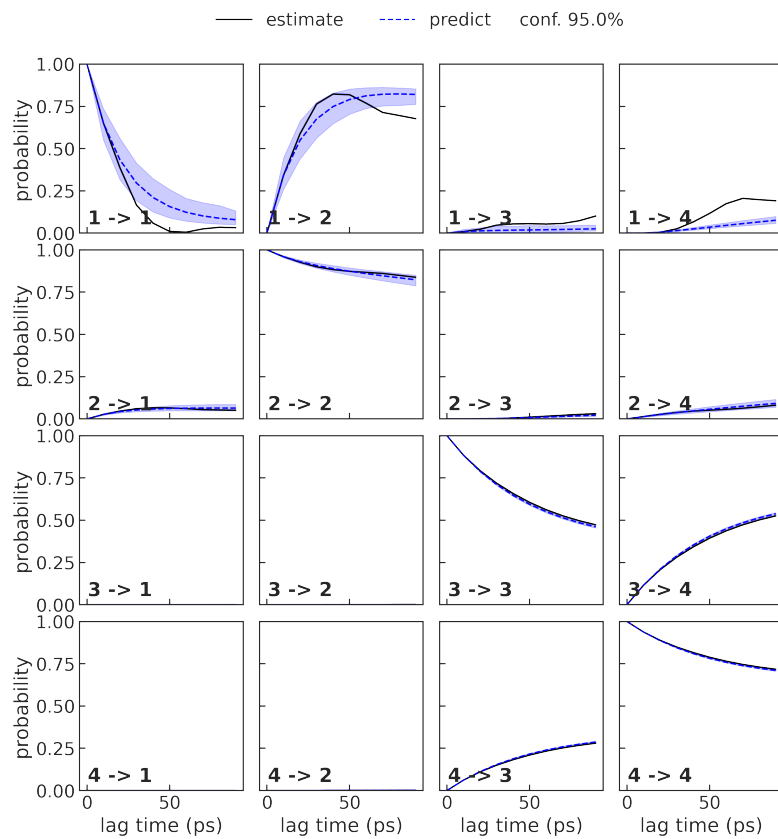

FIG. S6: Chapman-Kolmogorov tests corresponding to the hdbMSM for the alanine dipeptide

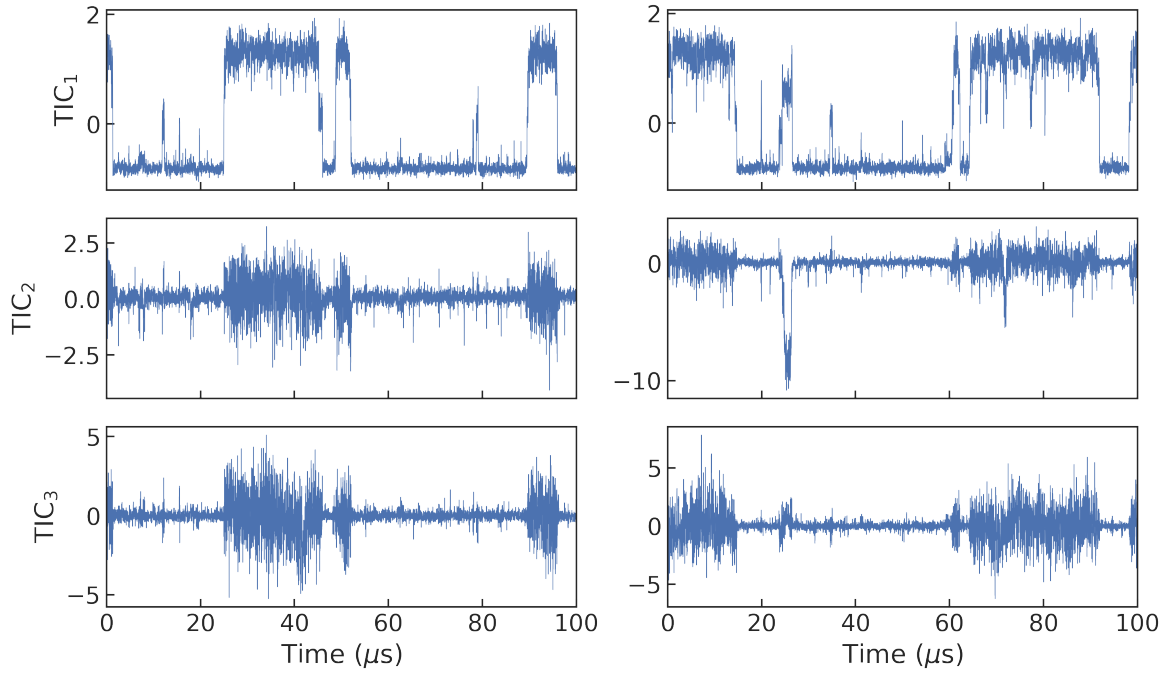

FIG. S7: Time series data for the projection on the first three TICA coordinates for the two long equilibrium trajectories of the FiP35 Pin WW domain.

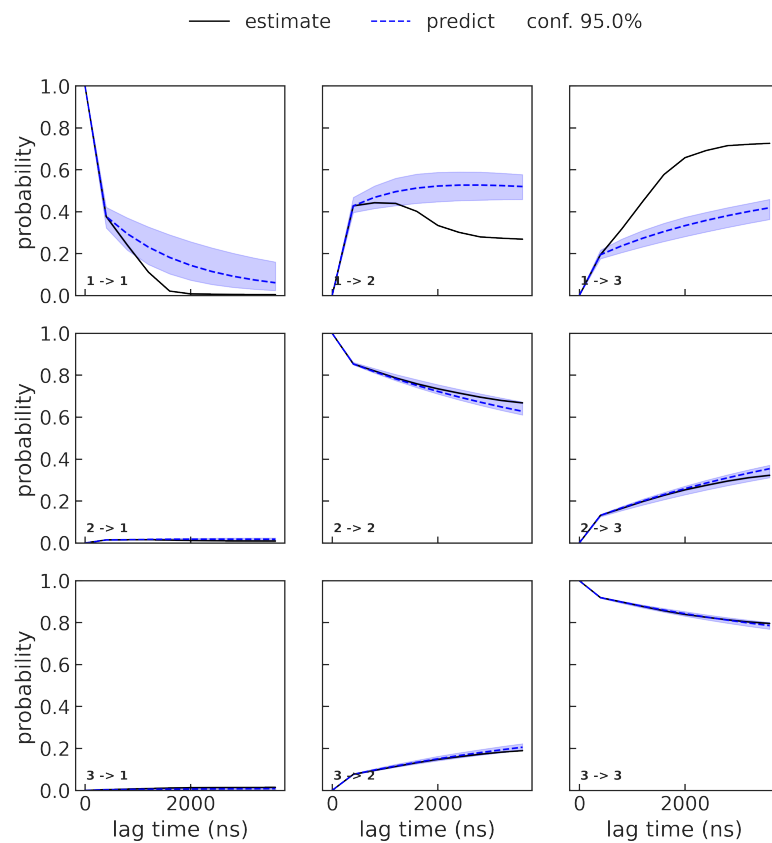

FIG. S8: Chapman-Kolmogorov tests corresponding to the FiP35 WW domain from the MSM coarse-grained using PCCA+.



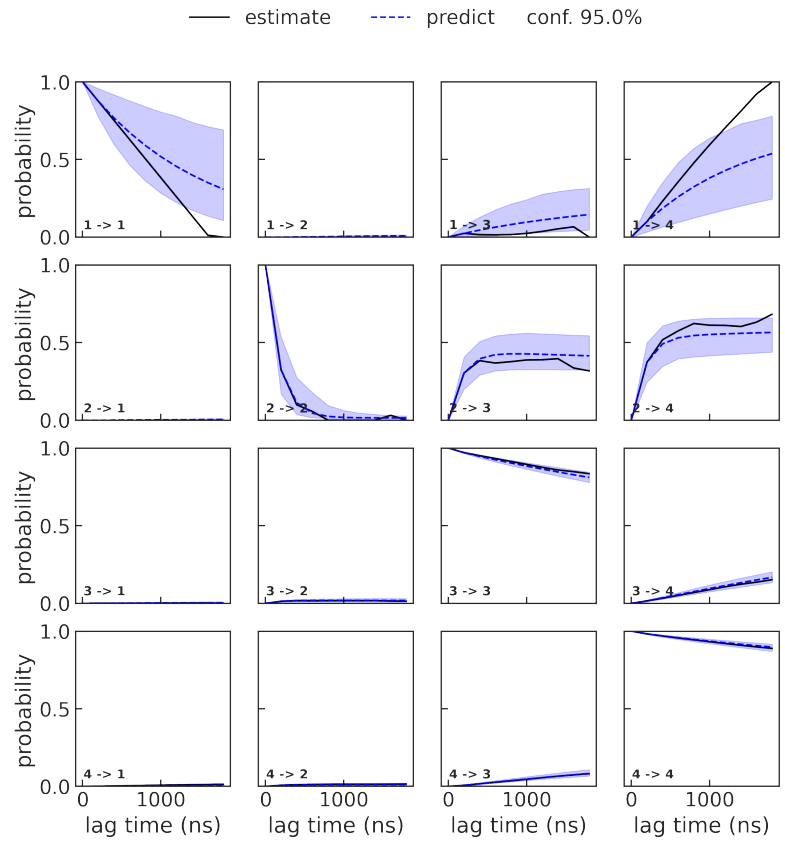

FIG. S9: Chapman-Kolmogorov tests corresponding to the hdbMSM for the Fip35 WW domain.

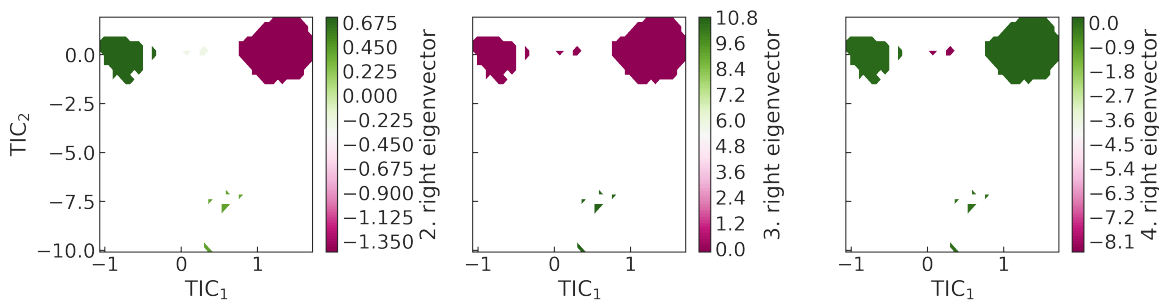

FIG. S10: Right eigenvectors corresponding to the three slowest modes of the hdbMSM for the Fip35 WW domain.
